# Supplementary material for: Robust topological nodal lines in halide carbides
Source: Royal Society of Chemistry journal article supplement (doi:10.1039/c9cp04330f), 2019-01-01
Supplement: c9cp04330f1.pdf [file c9cp04330f1.pdf]

## Supporting Information:

### Layered nodal lines in halide carbides

Anh Pham<sup>\*1,2,3</sup>, Frank Klose<sup>2,4</sup>, and Sean Li<sup>1</sup>

<sup>1</sup>School of Materials Science and Engineering, The University of New South Wales, Sydney NSW Australia

<sup>2</sup>The Australian Nuclear Science and Technology, Lucas Height NSW Australia.

<sup>3</sup>Centre for Nanophase Materials Sciences, Oak Ridge National Laboratory, Oak Ridge TN 37830 USA

<sup>4</sup>Guangdong Technion Israel Institute of Technology, Shantou, China.

In this Supporting Information, we first show the independence of the crystal structure and band structure with respect to the different value used in the mean field method  $PBE_{\text{sol}}+U$  [1,2], to justify our calculation of using the results from the PBE functional [3]. All the calculations were done within the inclusion of the van-der-waals interaction within the DFT+D3 scheme [4]. Next, we show the evolution of the Wannier charge centres for the two mirror eigenvalues corresponding with the two mirror planes  $k_z = 0$  and  $k_z = 0.5$  using the Wilson loop method [5, 6]. The band structure of different number of layers of  $Y_2C_2I_2$  which demonstrates persistent 2D nodal line property protected by the  $k_z = 0$  mirror plane. The crystal structure of the (010) edge state is shown Fig. S4. We also demonstrate that the 3D and 2D nodal line properties are also present in  $La_2C_2I_2$  similar to  $Y_2C_2I_2$  due to the existence of the  $k_z = 0$  and  $k_z = 0.5$  mirror planes

**Table 1.** Relaxed structural parameters of  $Y_2C_2I_2$  for different functionals. The values of  $PBE_{\text{sol}}+U$  ( $U=2$  eV) and the PBE functional are almost identical with the experimental lattice parameters, which justify our usage of the PBE functional in the main text.

| Structural parameters | U=0.25 eV | U=0.5 eV | U=1 eV | U=2 eV | PBE   | Experiment <sup>7</sup> |
|-----------------------|-----------|----------|--------|--------|-------|-------------------------|
| a (Å)                 | 7.21      | 7.22     | 7.22   | 7.23   | 7.24  | 7.20                    |
| b (Å)                 | 3.85      | 3.86     | 3.86   | 3.87   | 3.87  | 3.87                    |
| c (Å)                 | 10.44     | 10.43    | 10.41  | 10.38  | 10.36 | 10.40                   |
| $\beta$               | 93.64     | 93.67    | 93.73  | 93.78  | 93.83 | 93.70                   |

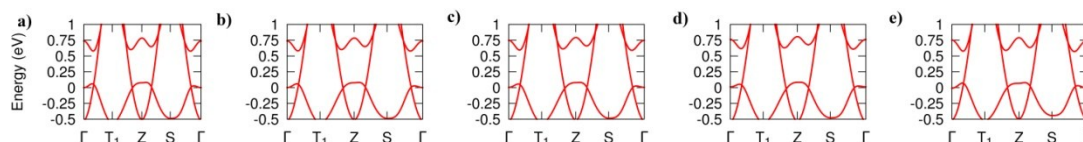

**Figure S1.** The band structure without SOC of  $Y_2C_2I_2$  calculated with  $PBE_{\text{sol}}+U$  with  $U$  values of a) 0.25 eV, b) 0.5 eV, c) 1 eV, d) 2 eV and e) calculated with the PBE functional.

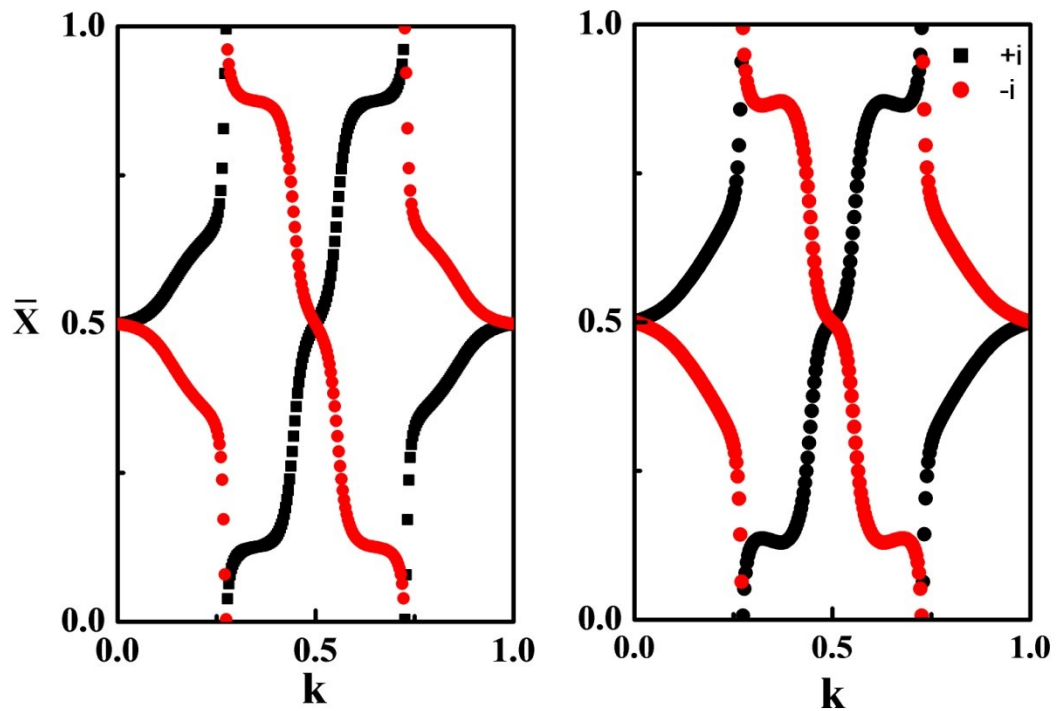

**Figure S2.** Evolution of the Wannier charge center associated with the  $k_z = 0$  (left) and  $k_z = 0.5$  (right) mirror planes for the eigenvalues  $+i$  and  $-i$ .

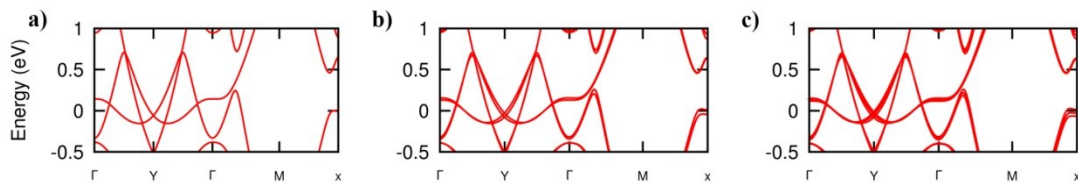

**Figure S3.** The band structure without SOC of a) 1 layer  $Y_2C_2I_2$ , b) 2 layers  $Y_2C_2I_2$ , and c) 3 layers  $Y_2C_2I_2$ .

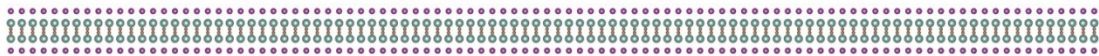

**Figure S4.** Crystal structure of the (010) edge in the monolayer  $Y_2C_2I_2$

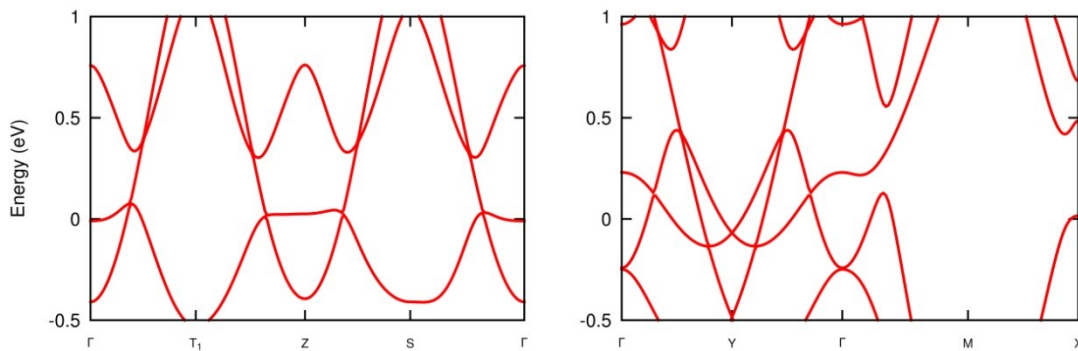

**Figure S5.** The band structure without SOC of a) 3D double nodal lines  $\text{La}_2\text{C}_2\text{I}_2$ , and b) 2D nodal line in a single layer  $\text{La}_2\text{C}_2\text{I}_2$ .

### References

1. Perdew, J. P.; Ruzsinszky, A.; Csonka, G. I.; Vydrov, O. A.; Scuseria, G.E.; Constantin, L.A.; Zhou, X.; Burke, K. *Phys. Rev. Lett.* **2008**, 100, 136406.
2. Dudarev, S. L. ; Botton, G. A.; Savrasov, S. Y.; Humphreys, C. J.; Sutton, A. P. *Phys. Rev. B* **1998**, 57, 1505.
3. J. P.; Burke, K.; Ernzerhof, M. *Phys. Rev. Lett.* **1996**, 77, 3865.
4. Grimme, S.; Antony, J.; Ehrlich, S.; Krieg, H. *J. Chem. Phys.* **2010**, 132, 154104.
5. Yu, R.; Qi, X. L.; Bernevig, A.; Fang, Z.; Dai, X. *Phys. Rev. B* **2011**, 84, 075119.
6. Weng, H.; Dai, X.; Fang, Z. *MRS Bull* **2014**, 39, 849.
7. Henn, R. W.; Strach, T.; Kremer, R. K.; Simon, A. *Phys. Rev. B* **1998**, 58, 364.
